# Supplementary material for: TNF-α promotes extracellular vesicle release in mouse astrocytes through glutaminase
Source: Springer Nature journal article supplement (doi:10.1186/s12974-017-0853-2), 2017-04-20

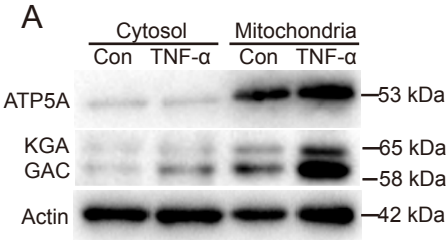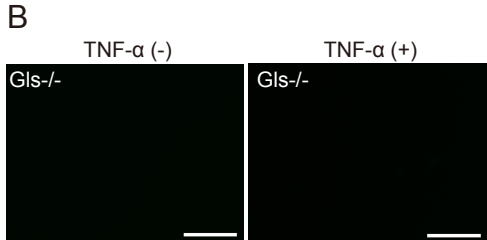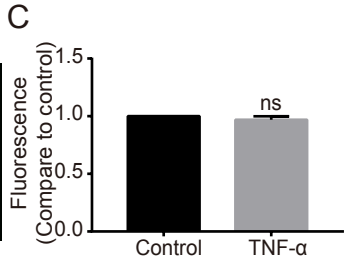

Supplement: MOESM2 [file 12237158]
